# Supplementary material
Source: Springer Nature journal article supplement (https://www.springermedizin.de/resource/supplementary/12887_2012_745_MOESM6_ESM.pdf/9475966)

|                                   |              |              |              |
|-----------------------------------|--------------|--------------|--------------|
| Balagué et al. (1988)             | 0,345        | 0,320        | 0,371        |
| Balagué et al. (1993)             | 0,336        | 0,255        | 0,428        |
| Balagué et al. (1994)             | 0,210        | 0,191        | 0,230        |
| Balagué et al. (1995)             | 0,510        | 0,471        | 0,549        |
| Bejia et al. (2005)               | 0,274        | 0,240        | 0,310        |
| Burton et al. (1996)              | 0,116        | 0,080        | 0,166        |
| Çakmak et al. (2004)              | 0,325        | 0,275        | 0,380        |
| Coelho et al. (2005)              | 0,481        | 0,414        | 0,549        |
| Ebrall (1994)                     | 0,403        | 0,365        | 0,442        |
| Fairbank et al. (1984)            | 0,086        | 0,063        | 0,116        |
| Gunzburg et al. (1999)            | 0,360        | 0,314        | 0,409        |
| Hangai et al. (2010)              | 0,616        | 0,602        | 0,630        |
| Harreby et al. (1999)             | 0,589        | 0,563        | 0,615        |
| Hestbaek et al. (2004)            | 0,320        | 0,309        | 0,331        |
| Jones et al. (2004)               | 0,402        | 0,360        | 0,446        |
| Kristensen & Ommundsen (2001)     | 0,630        | 0,559        | 0,696        |
| Kujala et al. (1992)              | 0,280        | 0,211        | 0,361        |
| Murphy et al. (2007)              | 0,550        | 0,512        | 0,587        |
| Newcomer & Sinaki (1996)          | 0,510        | 0,411        | 0,608        |
| Olsen et al. (1992)               | 0,304        | 0,279        | 0,330        |
| Prendeville & Dockrell (1998)     | 0,415        | 0,347        | 0,487        |
| Prista et al. (2004)              | 0,280        | 0,223        | 0,346        |
| Ratliffe (2010)                   | 0,564        | 0,523        | 0,604        |
| Salminen et al. (1992)            | 0,303        | 0,279        | 0,328        |
| Sato et al. (2008)                | 0,288        | 0,283        | 0,293        |
| Shehab et al. (2004)              | 0,578        | 0,529        | 0,626        |
| Sjölöe & Ljunggren (2001)         | 0,646        | 0,541        | 0,739        |
| Skoffer et al. (2007)             | 0,648        | 0,607        | 0,687        |
| Staes et al. (2003)               | 0,603        | 0,592        | 0,614        |
| Troussier et al. (1994)           | 0,368        | 0,341        | 0,396        |
| <b>Mean prevalence (RE model)</b> | <b>0,399</b> | <b>0,342</b> | <b>0,459</b> |

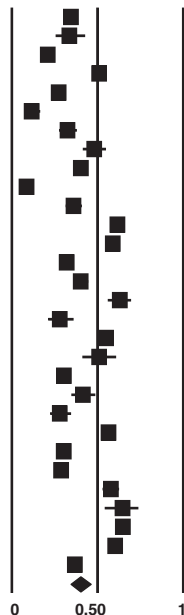

Supplement: MOESM6 [file 9475966]
